# Supplementary material for: Alteration of the Exhaled Volatile Organic Compound Pattern in Colorectal Cancer Patients after Intentional Curative Surgery—A Prospective Pilot Study
Source: MDPI journal article supplement (doi:10.3390/cancers15194785), 2023-09-29
Supplement: s1 [file s1]

## Supplementary tables

**Supplementary table S1 – Performance metrics prediction model**

|                    | Train data            | Test data             |
|--------------------|-----------------------|-----------------------|
| <b>AUC</b>         | 0.79 (CI 0.68 - 0.89) | 0.82 (CI 0.61 - 1.0)  |
| <b>Sensitivity</b> | 0.78 (CI 0.62 - 0.90) | 0.90 (CI 0.55 - 1.0)  |
| <b>Specificity</b> | 0.73 (CI 0.56 - 0.86) | 0.60 (CI 0.26 - 0.88) |
| <b>PPV</b>         | 0.74 (CI 0.62 - 0.83) | 0.69 (CI 0.51 - 0.83) |
| <b>NPV</b>         | 0.77 (CI 0.64 - 0.87) | 0.86 (CI 0.47 - 0.98) |
| <b>Accuracy</b>    | 76% (CI 64% - 85%)    | 75% (CI 51% - 91%)    |

**Supplementary table S2 – Pre-and post-operative paired concordance 2x2 Table**

|               | Post-operative |         |    |
|---------------|----------------|---------|----|
| Pre-operative | Incorrect      | Correct |    |
| Incorrect     | 2              | 7       | 9  |
| Correct       | 12             | 26      | 38 |
|               | 14             | 33      | 47 |
